# Supplementary material for: X-ray computed tomography investigation of structures in Opalinus Clay fromlarge-scale to small-scale after mechanical testing
Source: Copernicus journal article supplement (doi:10.5194/se-7-1171-2016), 2016-08-03
Supplement: Supplementary file [file se-7-1171-2016-supplement-title-page.pdf › se-7-1171-2016-supplement-title-page.pdf]

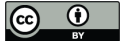

## *Supplement of*

# **X-ray computed tomography investigation of structures in Opalinus Clay from large-scale to small-scale after mechanical testing**

**Annette Kaufhold et al.**

*Correspondence to:* Matthias Halisch ([matthias.halisch@liag-hannover.de](mailto:matthias.halisch@liag-hannover.de))

- [se-7-1171-2016-supplement-title-page.pdf](#)
- [Video 1 - mylonitic zone.avi](#)
- [Video 2 - high res overview.avi](#)
- [Video 3 - speed scan data set.avi](#)

The copyright of individual parts of the supplement might differ from the CC-BY 3.0 licence.
